# Supplementary material for: Chitosan-Enriched Solution Blow Spun Poly(Ethylene Oxide) Nanofibers with Poly(Dimethylsiloxane) Hydrophobic Outer Layer for Skin Healing and Regeneration
Source: MDPI journal article supplement (doi:10.3390/ijms23095135), 2022-05-05
Supplement: s1 [file s1]

## SUPPLEMENTARY MATERIAL

### *Article*

#### **Chitosan-enriched solution blow spun poly(ethylene oxide) nanofibers with poly(dimethylsiloxane) hydrophobic outer layer for skin healing and regeneration**

**Emilia Szymańska <sup>1,\*</sup>, Michał Wojański <sup>2</sup>, Robert Czarnomysy <sup>3</sup>, Renata Dębowska <sup>4</sup>, Iwona Łopianiak <sup>2,5,7</sup>, Kamil Adasiewicz <sup>6</sup>, Tomasz Ciach <sup>2,7</sup>, and Katarzyna Winnicka <sup>1</sup>**

<sup>1</sup> Department of Pharmaceutical Technology, Medical University of Białystok, Mickiewicza 2c, 15-222 Białystok, Poland; e-mail: emilia.szymanska@umb.edu.pl (E.S.), kwin@umb.edu.pl (K.W.)

<sup>2</sup> Faculty of Chemical and Process Engineering, Warsaw University of Technology, Waryńskiego 1, 00-645 Warsaw, Poland; e-mail: michal.wojasinski@pw.edu.pl (M.W.); tomasz.ciach@pw.edu.pl (T.C.);

<sup>3</sup> Department of Synthesis and Technology of Drugs, Medical University of Białystok, Kilińskiego 1, 15-089 Białystok, Poland; E-mail: robert.czarnomysy@umb.edu.pl (R.C.)

<sup>4</sup> Dr Irena Eris, Centre for Science and Research, Armii Krajowej 12, 05-500 Piaseczno, Poland; e-mail: Renata.Debowska@DrIrenaEris.com (R.D.)

<sup>5</sup> Doctoral School no. 1, Warsaw University of Technology, Plac Politechniki 1, 00-661 Warsaw, Poland; e-mail: iwona.lopianiak.dokt@pw.edu.pl (I.Ł.)

<sup>6</sup> Student Scientific Group at Department of Pharmaceutical Technology, Medical University of Białystok, Mickiewicza 2c, 15-222 Białystok, Poland; e-mail: adasiewicz.k@outlook.com (K.A.)

<sup>7</sup> CEZAMAT, Warsaw University of Technology, Poleczki 19, 02-822 Warsaw, Poland

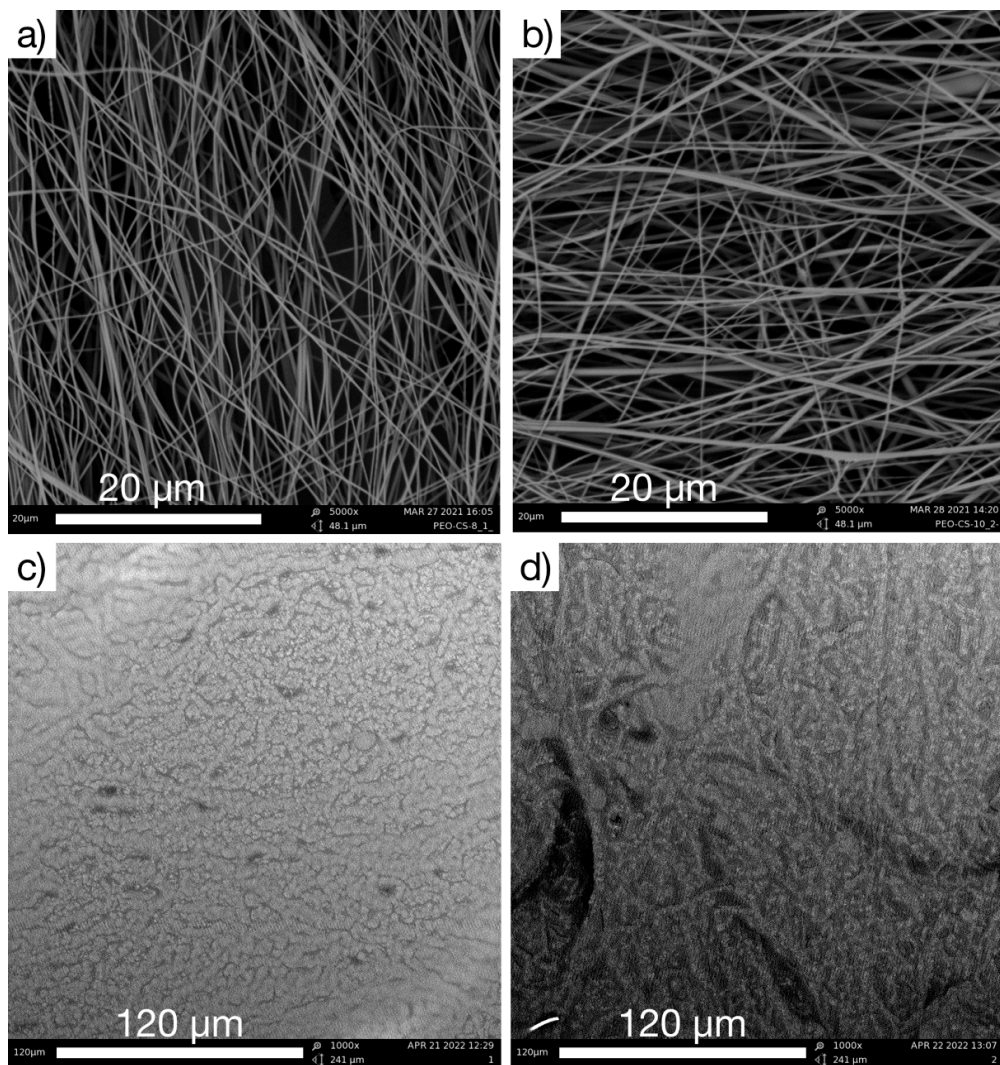

**Figure S1.** Representative SEM image of unmodified CS/PEO nanofibers prepared of: (a) 8% or (b) 10% (*w/w*) polymer blend solution (original magnification  $\times 5000$ ) and corresponding formulations upon coating with poly(dimethylsiloxane) (c,d) (magnification  $\times 1000$ ).
